# Supplementary material
Source: PubMed Central journal article supplement (PMC6404959)
Supplement: NIHMS68505-supplement-Supplementary_Notes.pdf [file NIHMS68505-supplement-Supplementary_Notes.pdf]

## 1 Supplementary Notes

### 3 Instructions to use Matlab Code:

- 4 1. Copy program files (\*.m and \*.fig) into a separate folder and add the path to the Matlab search paths using:  
5 *pathtool -> Add Folder -> Save*  
6
- 7 2. Copy files containing superresolution images (\*.csv) into a separate folder. Example files are included for random and  
8 clustered simulated data. Molecules were assumed to be observed seven times on average (exponentially  
9 distributed). Clusters were simulated at  $3 \mu\text{m}^2$  and 75 nm radius. See Methods for more details.  
10
- 11 3. Execute *clustermask\_createset.m*

12 Note: The GUI is optimized for Matlab release 2015b.

- 14 4. Press *Open Folder* to select the folder that contains the example files for analysis.

- 16 5. Adjust the following parameters if needed (or use default values):

|                             |                                                                                                                                                                                                                           |
|-----------------------------|---------------------------------------------------------------------------------------------------------------------------------------------------------------------------------------------------------------------------|
| 18 ROI size (pixel)         | size of recorded image                                                                                                                                                                                                    |
| 19 Pixelsize (in nm)        | camera pixel size                                                                                                                                                                                                         |
| 20 Gridsize (pixel)         | number of pixels used for binary mask                                                                                                                                                                                     |
| 22 resulting pixelsize      | here the effective pixel size of binary masks is automatically calculated from the given parameters (ROI size, Pixelsize, Gridsize). It is recommended to keep this value significantly below the localization precision. |
| 26 Sig for gaussians (nm)   | standard deviation of Gaussians used to represent localizations                                                                                                                                                           |
| 27 Cut gauss at x times sig | radius at which Gaussians are set to zero                                                                                                                                                                                 |
| 29 use same cellroi for all | check box to use the same ROI for all files                                                                                                                                                                               |
| 31 Figure parameters        | check boxes to specify output figure parameters                                                                                                                                                                           |
| 33 TH1-6                    | defines thresholds; set to 0 to skip                                                                                                                                                                                      |
| 35 Settings rho vs eta plot | check boxes to specify output plots;<br>36 edit parameters for reference curve                                                                                                                                            |

- 38 6. Hit *Process Files* to start the analysis. First a dialog window will open to specify ROIs for analysis. When ROIs for all  
39 files have been drawn, the program will start to analyze the files in the specified folder. The user can also mark the  
40 checkbox "*use same cellroi for all*", in order to reuse the same ROI for all files in the chosen folder.  
41

- 42 7. Results are saved in *result.m*, which contains the following output variables:

|             |                                                                                                                                                                                                                                                                                      |
|-------------|--------------------------------------------------------------------------------------------------------------------------------------------------------------------------------------------------------------------------------------------------------------------------------------|
| 44 num_locs | array containing the calculated number of localizations outside ( $\#_{\text{out}}$ ) and inside ( $\#_{\text{in}}$ ) of apparent<br>45 clusters. Different thresholds are grouped pair-wise ( $\#_{\text{out}}$ , $\#_{\text{in}}$ ) in the order specified in<br>46 no_locs_legend |
|-------------|--------------------------------------------------------------------------------------------------------------------------------------------------------------------------------------------------------------------------------------------------------------------------------------|

- 1 num\_locs\_legend specifies the order of the columns in the variable num\_locs
- 2 clust\_area calculated clustered area ( $A_{in}$ )
- 3 cell\_area area of the ROI drawn in the dialog window (A)
- 4 files file names of analyzed files
- 5 eta array containing the values for relative clustered area (rows correspond to
- 6 selected files; columns correspond to selected thresholds)
- 7 rho array containing values for localization density inside clusters (rows correspond
- 8 to selected files; columns correspond to selected thresholds)
- 9 fit struct containing the fitted parameters for all thresholds
- 10
- 11 8. Output graphs show the normalized  $\rho/\eta$  plot including the reference curve for randomly distributed data (red). Data
- 12 are plotted as blue circles. Results from example files will be comparable to **Figure 1**.
